# Supplementary material for: The divergence and dispersal of early perissodactyls as evidenced by early Eocene equids from Asia
Source: Springer Nature journal article supplement (doi:10.1038/s42003-018-0116-5), 2018-08-09
Supplement: 42003_2018_116_MOESM1_ESM.pdf [file 42003_2018_116_MOESM1_ESM.pdf]

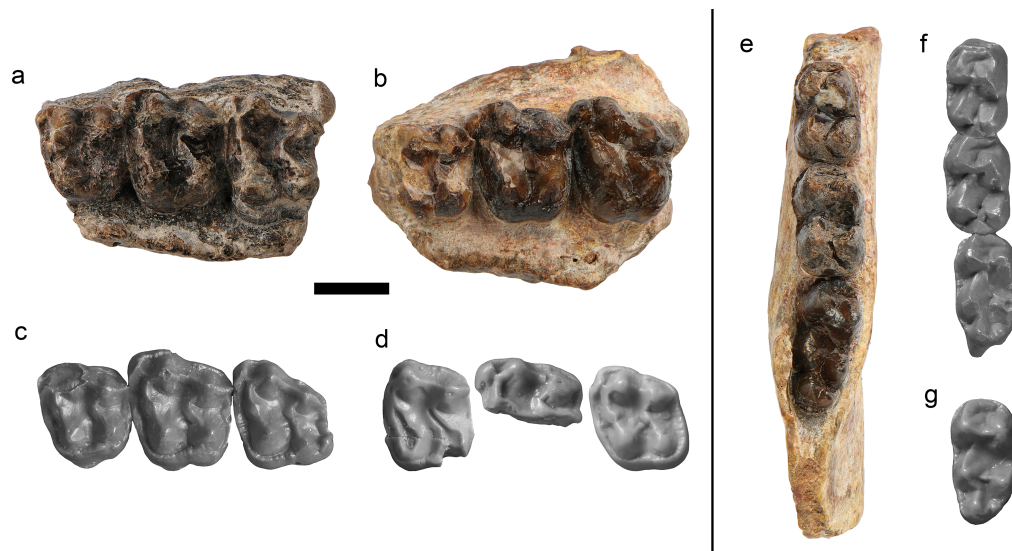

**Supplementary Figure 1. Comparisons of the earliest Eocene equids and ceratomorph *Orientolophus*.** **a**, *Erihippus tingae* gen. et sp. nov., left maxilla with DP4-M2 (IVPP V 5790); **b**, *Orientolophus hengdongensis*, right maxilla with DP4-M2 (reversed, IVPP V 5789, lectotype); **c**, *Sifrhippus sandrae*, left M1-3 (AMNH FM 127481, cast of UM 79889); **d**, *Cymbalophus cuniculus*, right M1 and left M2-3 (AMNH FM 119185 (reversed), 119186, and 119190, casts of NHMUK PV M29709, Ipswich Museum no. 1971.169, and NHMUK PV OR36569, lectotype); **e**, *E. tingae*, left mandible with m1-3, IVPP V 5789.1, holotype; **f**, *S. sandrae*, right m1-3 (reversed, AMNH FM 127483, cast of UM 83567, holotype); **g**, *C. cuniculus*, right m3 (reversed, AMNH FM 119191, cast of Ipswich Museum no. 1951.28.25). Scale: 5 mm.

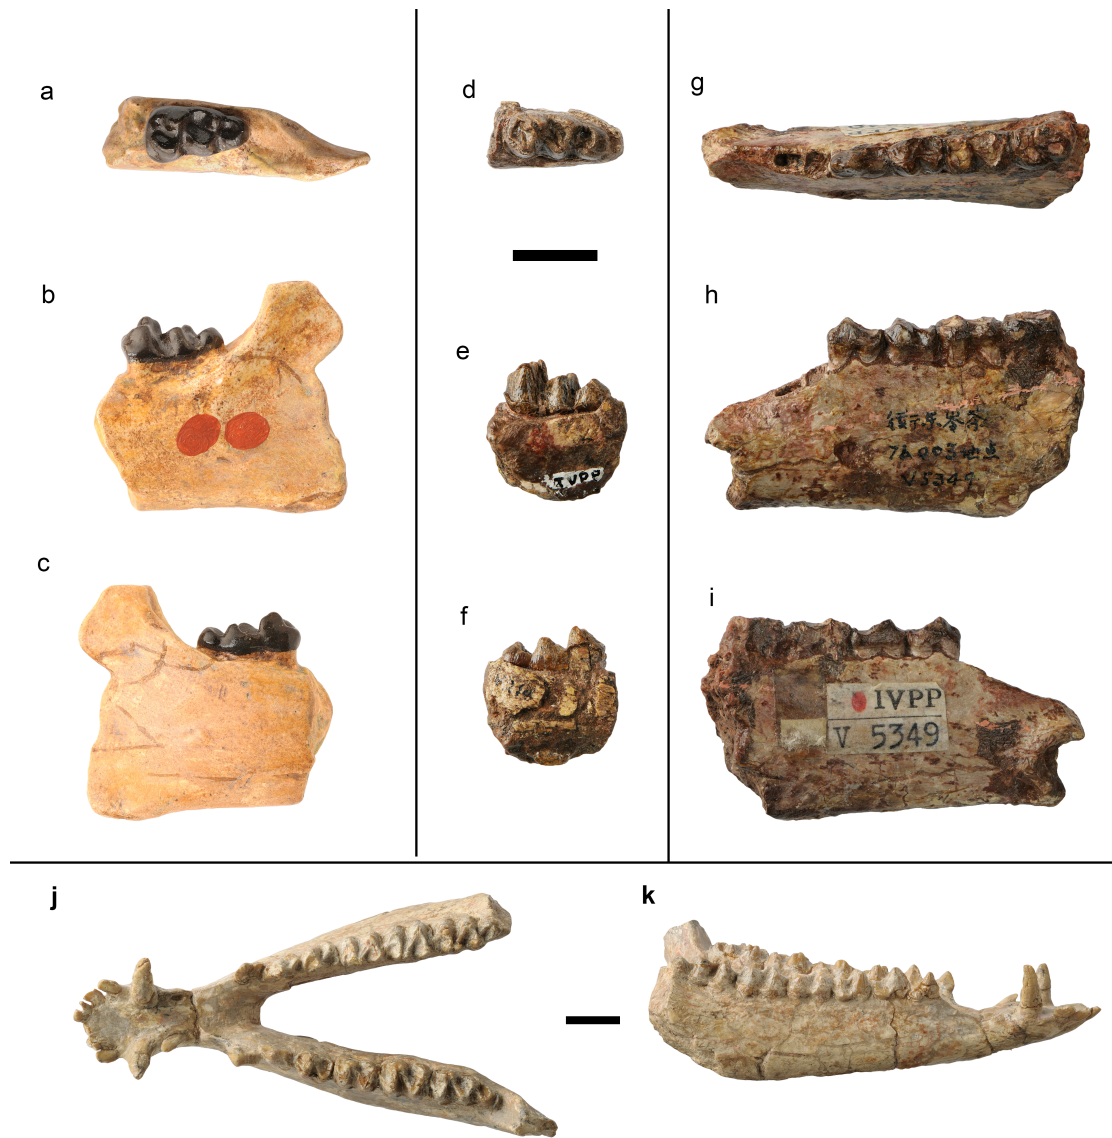

**Supplementary Figure 2. Comparisons of the early Eocene ancylopods and brontotheres.** **a-f**, *Protomoropus? hengyangensis* (Young, 1944), **a-c**, left mandible with m3 (IVPP V 214, cast, holotype) in occlusal (a), buccal (b), and lingual views (c); **d-f**, left mandible with m3 (IVPP V 7453) in occlusal (d), buccal (e), and lingual views (f); **g-i**, *Danjiangia lambdodon* sp. nov., left mandible with p3-m2 (IVPP V 5349, holotype) in occlusal (g), buccal (h), and lingual views (i); **j-k**, lower jaw of *Danjiangia pingi* (IVPP V 10842, holotype) in occlusal (j) and right buccal views (k). Scale: 1 cm.

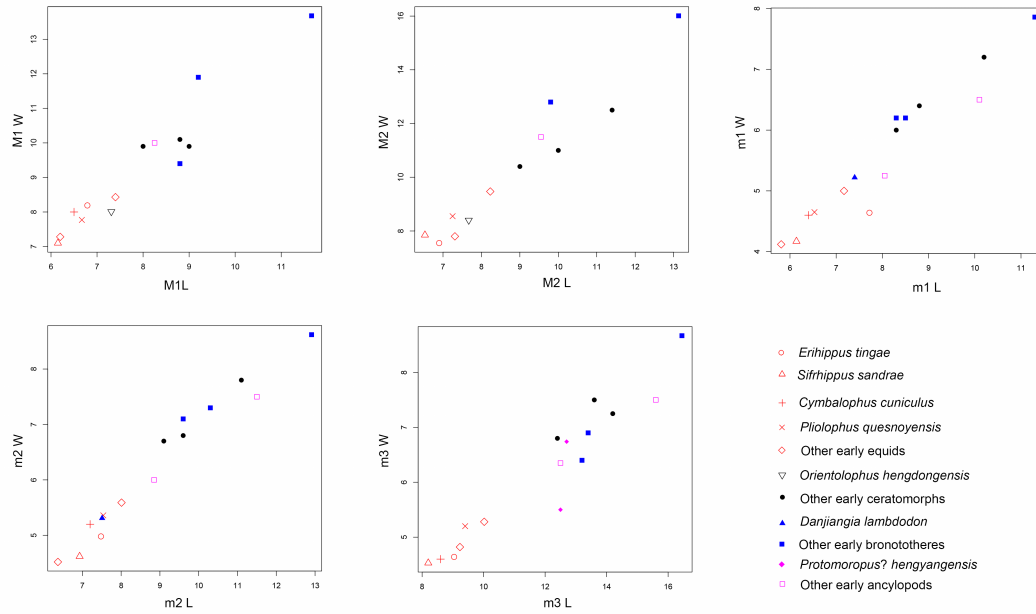

**Supplementary Figure 3. Scatter plots for molar size of compared early perissodactyls.** Red, black, blue, and magenta symbols represent early equids, ceratomorphs, brontotheres, and ancylopods, respectively. For raw data, refer to the Supplementary Table 1.

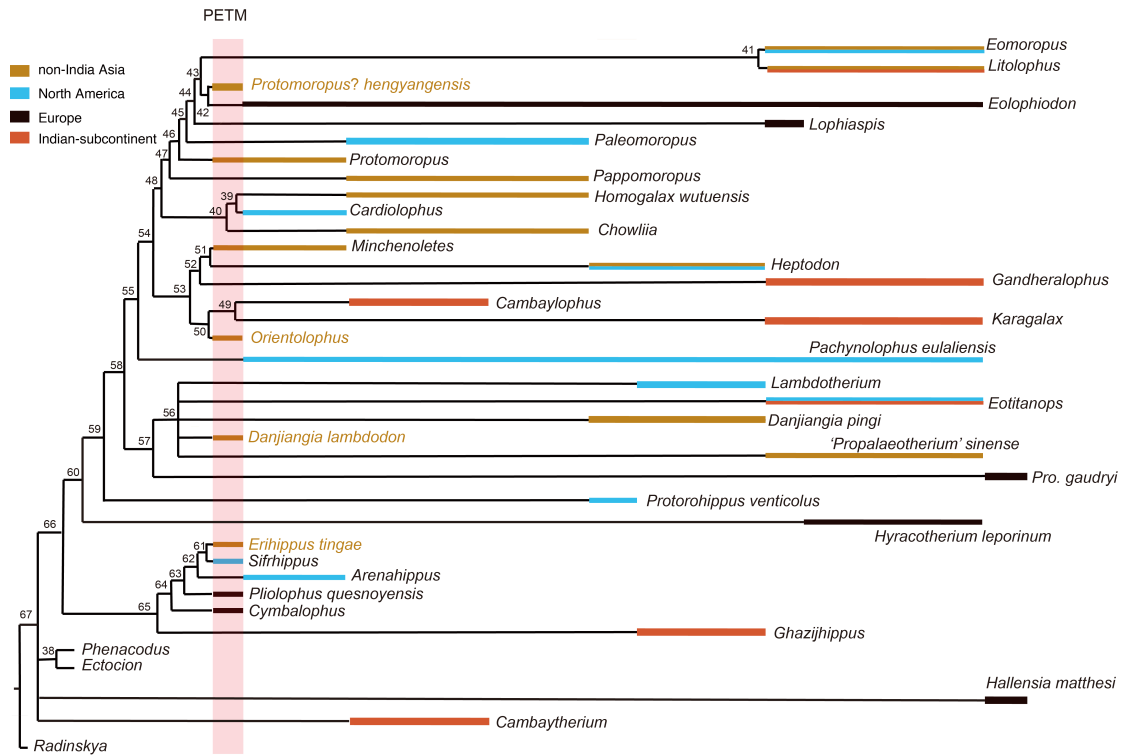

| 57           | 56  | 55                 | 54    | 53             | 52   | 51            |            | Age (Ma) |                              |     |     |
|--------------|-----|--------------------|-------|----------------|------|---------------|------------|----------|------------------------------|-----|-----|
| Paleocene    |     | Eocene             |       |                |      |               |            |          | Age (Ma)<br>(Stage)<br>Index |     |     |
| Thanetian    |     | Ypresian           |       |                |      |               |            |          |                              |     |     |
|              |     | c24r               |       |                | c23r |               |            | PC       |                              |     |     |
| Clarkforkian |     | Wasatchian         |       |                |      |               | Bridgerian |          | NALMA                        |     |     |
| Cf1          | Cf2 | Cf3                | Wa0-M | Wa1            | Wa2  | Wa3           | Wa4        | Wa5      |                              | Wa6 | Wa7 |
| Gashatan     |     | Bumbanian          |       |                |      |               | Arshantan  |          | ALMA                         |     |     |
|              |     | Orientolophus-zone |       | Homogalax-zone |      | Heptodon-zone |            |          |                              |     |     |
| MP6          |     | MP7                |       | MP8-9          |      | MP10          |            | MP       |                              |     |     |
| PE I         |     | PE II              |       | PE III         |      | PE IV         |            |          | PE V                         |     |     |
|              |     |                    |       |                |      |               |            | PE       |                              |     |     |

**Supplementary Figure 4. The strict consensus tree of 63 equally most parsimonious trees and the distribution of selected taxa.** The unambiguous synapomorphies at nodes are listed in the Supplementary Table 2. The bottom column showing Polarity Chron (PC), North American Land Mammal Ages (NALMA), Asian Land Mammal Ages (ALMA), European Reference Levels (MP), and Paleocene-Eocene transition (PE) modified from the sources<sup>1-5</sup>.



### Supplementary Table 1.

Measurements of *Erihippus*, *Orientalophus*, *Lambdodon* and other compared early perissodactyls. Measurements of *Sifrihippus* from Gingerich<sup>6</sup>, *Pliolophus quesnoyensis* from the mean value according to Bronnert, et al.<sup>7</sup>, *Arenahippus* from Kitts<sup>8</sup>, *Chowliia* and *Paleomoropus* from Tong and Wang<sup>9</sup>, *Cardiolophus* from Gingerich<sup>10</sup>, *Danjiangia* from Wang<sup>11</sup>, ‘*Propalaeotherium*’ *sinense* from Zdansky<sup>12</sup>, *Protomoropus* from Hooker and Dashzeveg<sup>13</sup>. The measurements of *Cymbalophus* were measured from the figures of Hooker<sup>14</sup>. The measurements of *Minippus* were measured from the casts of AMNH FM 4680 and NMMNH P9589. The measurements of *Lambdotherium* were from the casts of CM 62459 and CM 4963.

| species              | M1    |       | M2    |       | M3    |       | m1   |       | m2    |      | m3    |      |
|----------------------|-------|-------|-------|-------|-------|-------|------|-------|-------|------|-------|------|
|                      | L     | W     | L     | W     | L     | W     | L    | W     | L     | W    | L     | W    |
| <i>Erihippus</i>     | 6.79  | 8.19  | 6.9   | 7.55  | NA    | NA    | 7.72 | 8.19  | 7.48  | 4.98 | 9.04  | 4.64 |
| <i>Sifrihippus</i>   | 6.15  | 7.1   | 6.53  | 7.85  | 6.13  | 7.26  | 6.14 | 7.1   | 6.93  | 4.62 | 8.2   | 4.53 |
| <i>Cymbalophus</i>   | 6.5   | 8     | 7.5   | NA    | 6.5   | 7.5   | 6.4  | 8     | 7.2   | 5.2  | 8.6   | 4.6  |
| <i>Pliolophus</i>    |       |       |       |       |       |       |      |       |       |      |       |      |
| <i>quesnoyensis</i>  | 6.67  | 7.77  | 7.25  | 8.55  | 7.8   | 8.6   | 6.53 | 7.77  | 7.54  | 5.36 | 9.4   | 5.2  |
| <i>Arenahippus</i>   | 7.4   | 8.43  | 8.23  | 9.47  | 7.62  | 9.35  | 7.17 | 8.43  | 8.01  | 5.59 | 10.02 | 5.28 |
| <i>Minihippus</i>    | 6.2   | 7.28  | 7.31  | 7.8   | 6.55  | 7.53  | 5.81 | 7.28  | 6.37  | 4.52 | 9.23  | 4.82 |
| <i>Orientalophus</i> | 7.31  | 8.01  | 7.67  | 8.4   | NA    | NA    | NA   | NA    | NA    | NA   | NA    | NA   |
| <i>Chowliia</i>      | 8.8   | 10.1  | 11.4  | 12.5  | 10.1  | 12.5  | 10.2 | 10.1  | 11.1  | 7.8  | 14.2  | 7.25 |
| <i>Cardiolophus</i>  |       |       |       |       |       |       |      |       |       |      |       |      |
| <i>radinskyi</i>     | 9     | 9.9   | 9     | 10.4  | 8.8   | 10    | 8.8  | 9.9   | 9.1   | 6.7  | 12.4  | 6.8  |
| <i>Cardiolophus</i>  |       |       |       |       |       |       |      |       |       |      |       |      |
| <i>radinskyi</i>     | 8     | 9.9   | 10    | 11    | 8.8   | 11.1  | 8.3  | 9.9   | 9.6   | 6.8  | 13.6  | 7.5  |
| <i>Danjiangia</i>    |       |       |       |       |       |       |      |       |       |      |       |      |
| <i>lambdodon</i>     | NA    | NA    | NA    | NA    | NA    | NA    | 7.4  | NA    | 7.51  | 5.31 | NA    | NA   |
| <i>Proto.?</i>       | NA    | NA    | NA    | NA    | NA    | NA    | NA   | NA    | NA    | NA   | 12.7  | 6.74 |
| <i>hengyangensis</i> | NA    | NA    | NA    | NA    | NA    | NA    | NA   | NA    | NA    | NA   | 12.5  | 5.5  |
| <i>Danjiangia</i>    | 9.2   | 11.9  | 9.8   | 12.8  | 9.3   | 12.6  | 8.3  | 11.9  | 9.6   | 7.1  | 13.4  | 6.9  |
| <i>Pro. sinense</i>  | 8.8   | 9.4   | NA    | NA    | 10.8  | 12.6  | 8.5  | 9.4   | 10.3  | 7.3  | 13.2  | 6.4  |
| <i>Lambdo-</i>       |       |       |       |       |       |       |      |       |       |      |       |      |
| <i>therium</i>       | 11.66 | 13.68 | 13.13 | 16.01 | 13.31 | 15.92 | 11.3 | 13.68 | 12.91 | 8.62 | 16.45 | 8.67 |
| <i>Protomoropus</i>  |       |       |       |       |       |       |      |       |       |      |       |      |
| <i>gabunia</i>       | 8.25  | 10    | 9.55  | 11.5  | 10.2  | 11.7  | 8.05 | 10    | 8.85  | 6    | 12.5  | 6.35 |
| <i>Paleomoropus</i>  | NA    | NA    | NA    | NA    | NA    | NA    | 10.1 | NA    | 11.5  | 7.5  | 15.6  | 7.5  |

**Supplementary Table 2.**

Distribution of unambiguous synapomorphies (strict consensus tree, Supplementary Fig. 4)

| Node | Characters and state                                                                                                 |
|------|----------------------------------------------------------------------------------------------------------------------|
| 38   | 9(0), 10(0), 12(0), 14(2), 15(2), 17(0), 20(0), 22(0), 26(0), 29(0), 38(0), 39(0), 46(0), 57(0), 58(0), 66(0), 67(1) |
| 66   | 4(1), 28 (1), 31(1), 35(1), 54(1), 58(1), 67(3)                                                                      |
| 60   | 14(1), 15(1)                                                                                                         |
| 59   | 8(1), 16(2), 18(0), 32(1), 41(1), 49(1), 66(0)                                                                       |
| 58   | 11(2), 28(2), 31(3), 42(2), 52(1), 58(3), 62(1)                                                                      |
| 55   | 1(0), 5(0), 19(1), 55(1)                                                                                             |
| 54   | 14(0), 15(0), 18(2), 23(1), 30(0), 34(0), 38(0), 42(3)                                                               |
| 48   | 8(0), 13(1), 44(1), 58(2)                                                                                            |
| 40   | 7(2), 63(1)                                                                                                          |
| 39   | 56(1), 67(2)                                                                                                         |
| 47   | 18(1), 37(1)                                                                                                         |
| 46   | 16(3), 45(1)                                                                                                         |
| 45   | 13(3), 47(1), 62 (2)                                                                                                 |
| 44   | 65(2)                                                                                                                |
| 43   | 25(0), 27(1), 49(0)                                                                                                  |
| 41   | 18(0), 19(0), 44(0), 56(1), 61(2)                                                                                    |
| 42   | 21(3)                                                                                                                |
| 53   | 4(2), 17(0), 36(1)                                                                                                   |
| 50   | 28(1), 63(1), 65(2)                                                                                                  |
| 49   | 25(0), 49(0)                                                                                                         |
| 52   | 3(2), 13(3)                                                                                                          |
| 51   | 1(2), 7(2), 21(2), 27(1)                                                                                             |
| 57   | 4(0), 16(3), 17(2), 44(1)                                                                                            |
| 56   | 1(3), 2(1), 14(2), 15(2), 23(1), 31(2), 34(0), 35(0), 49(2), 50(3), 58(2), 61(2), 62(2), 63(2), 65(2), 67(4)         |
| 65   | 3(1), 23(1), 52(1)                                                                                                   |
| 64   | 1(0), 5(0), 13(2), 67(1)                                                                                             |
| 63   | 25(0)                                                                                                                |
| 62   | 42(4), 51(1), 55(1)                                                                                                  |
| 61   | 60(1), 61(1), 64(1)                                                                                                  |

## **Supplementary Note 1**

### **Geological Setting**

The Hengyang Basin is located in the south-central part of Hunan Province, China. It is roughly square with an area of about 5200 square kilometers<sup>15</sup>. Cretaceous rocks are widely distributed in the basin, whereas the early Paleogene deposits are mainly exposed in the northeastern part of the Basin. The early Eocene mammalian fossils were found from the Lingcha area, about 15 km southwest of Hengdong County. The research history of the “Red Beds” in Lingcha area has been summarized in detail by Ting<sup>16</sup>.

The early Paleogene deposits in the Lingcha area form a syncline with an axis directed northeast<sup>16</sup>. The strata consist of the late Paleocene Limuping Formation with the lower Lingcha Fauna and the early Eocene Lingcha Formation with the upper Lingcha Fauna<sup>17,18</sup>. The Limuping Formation is predominantly purplish red silty mudstone with brownish purple, gray muddy siltstone, sandstone, and muddy dolomite<sup>17</sup>. The Lingcha Formation is predominantly brownish red silty mudstone with brownish purple/yellow silty sandstone and sandstone. The mudstone of the Lingcha Formation often bears more or less calcareous nodules<sup>19</sup>. Three sections have been measured from the Lingcha area<sup>16,19</sup>. Sections 1 and 2 are in the south limb of the syncline, whereas section 3 is in the north. Section 1 is measured from Pukuitang to Lingcha, and is about 555.4 meters thick<sup>16</sup>. The upper Lingcha Fauna was found between the 530 and 540 meters levels of the section<sup>16</sup>. Section 2 is west of Limuping and 16.8 meters thick, bearing the lower Lingcha Fauna in the middle<sup>16</sup>. Section 3 is measured from Tianzhifen to near Jixianwan, and is about 284.4 meters thick. The upper Lingcha Fauna was found between the 255 and 257 meters levels of the section<sup>16</sup>. Based on a combination of field observations, isotopic data, and paleomagnetic data, the 548 meters level of section 1 was correlated with 272 meters level of section 3, and the remainder of these sections can be also correlated on the basis of assuming equal sedimentation rates<sup>16</sup>. Thus, the fossil-bearing level of section

3 can be correlated from 531 to 533 meters of section 1, which is within the range of the upper Lingcha Fauna in section 1. Section 2 is correlated to the ~350 m level of section 1.

The composite section with all values projected on the section 1 clearly shows the Carbon Isotope Excursion at the Paleocene-Eocene boundary<sup>16</sup>. The Paleocene-Eocene boundary was placed at 516 meters, roughly equivalent to 240 m in section 3 that first produced the unusually low  $\delta^{13}\text{C}$  value. Ting<sup>16</sup> pointed out that the Upper Lingcha Fauna occurs from about 15 meters above the Paleocene/Eocene boundary to the minimum carbon isotope value at 548 meters<sup>3</sup>.

1 **Supplementary Note 2**

2 Comparisons of dental characters among *Erihippus*, *Orientolophus*, and other representatives of early equids<sup>6,7,14,20</sup> and tapiromorphs<sup>9,10</sup>.

3

|                              | Equidae                   |                              |                                |                             |                         | Tapiromorpha         |                    |                       |                    |
|------------------------------|---------------------------|------------------------------|--------------------------------|-----------------------------|-------------------------|----------------------|--------------------|-----------------------|--------------------|
|                              | <i>Sifrhippus sandrae</i> | <i>Cymbalophus cuniculus</i> | <i>Pliolophus quesnoyensis</i> | <i>Arenahippus grangeri</i> | <i>Erihippus tingae</i> | <i>Orientolophus</i> | <i>Chowliia</i>    | <i>Cardiolo- phus</i> | <i>Homogalax</i>   |
| <b>DP4</b>                   |                           |                              |                                |                             |                         |                      |                    |                       |                    |
| 1. Paraconule and metaconule | Distinct                  | ?                            | Distinct                       | ?                           | Distinct                | Weak or absent       | ?                  | ?                     | Weak or absent     |
| 2. Metacone fold             | Present                   | ?                            | Present                        | ?                           | Present                 | Absent               | ?                  | ?                     | ?                  |
| <b>M1-2</b>                  |                           |                              |                                |                             |                         |                      |                    |                       |                    |
| 3. Parastyle                 | Small                     | Small                        | Small                          | Small                       | Small                   | Large                | Large              | Large                 | Large              |
| 4. Buccal side of paracone   | Pinched mesiodistally     | Generally convex             | Generally convex               | Generally convex            | Pinched mesiodistally   | Generally convex     | Generally convex   | Generally convex      | Generally convex   |
| 5. Lingual side of paracone  | Nearly flat               | Convex                       | Convex or nearly flat          | Convex                      | Nearly flat             | Convex               | Convex             | Convex                | Convex             |
| 6. Buccal rib of metacone    | Weak                      | Weak                         | Weak                           | Weak                        | Strong                  | Strong               | Weak               | Weak                  | Weak               |
| 7. Paraconule and metaconule | Distinct                  | Distinct                     | Distinct                       | Distinct                    | Distinct                | Weak or confluent    | Weak or confluent  | Weak or confluent     | Weak or confluent  |
| 8. Position of paraconule    | Midpoint of protoloph     | Midpoint of protoloph        | Midpoint of protoloph          | Midpoint of protoloph       | Midpoint of protoloph   | Close to protocone   | Close to protocone | Close to protocone    | Close to protocone |
| 9. Metacone fold             | Present                   | Present                      | Present or absent              | Absent                      | Present                 | Absent               | Present            | Present or absent     | Present or absent  |

|                                         |                                 |                                 |                                     |                                 |                                 |                                |                                |                                |                                |
|-----------------------------------------|---------------------------------|---------------------------------|-------------------------------------|---------------------------------|---------------------------------|--------------------------------|--------------------------------|--------------------------------|--------------------------------|
| 10. Lingual cingulum                    | Interrupted at hypocone         | Complete                        | Complete or interrupted at hypocone | Complete                        | Absent                          | Restrict in the central valley | Restrict in the central valley | Restrict in the central valley | Restrict in the central valley |
| <b>m1-3</b>                             |                                 |                                 |                                     |                                 |                                 |                                |                                |                                |                                |
| 11. Protolophid                         | Notched                         | Unnotched                       | Notched                             | Notched                         | Notched                         | ?                              | Notched                        | Notched                        | Notched                        |
| 12. Paralophid orientation              | Mesiolingually                  | Mesially and slightly lingually | Mesially and slightly lingually     | Mesially and slightly lingually | Mesially and slightly lingually | ?                              | Mesially                       | Mesially                       | Mesially                       |
| 13. Twinned metaconid                   | Present                         | Present                         | Present                             | Present                         | Absent                          | ?                              | Present                        | Present                        | Present                        |
| 14. Cristid obliqua orientation         | Midpoint of protolophid         | Buccal to midpoint              | Midpoint of protolophid             | Midpoint of protolophid         | Buccal to midpoint              | ?                              | Buccal to midpoint             | Buccal to midpoint             | Buccal to midpoint             |
| 15. Postcristid/hypolophid of m1-2      | Deeply notched                  | Deeply notched                  | Deeply notched                      | Deeply notched                  | Deeply notched                  | ?                              | Nearly unnotched               | Nearly unnotched               | Nearly unnotched               |
| 16. Postcristid/Hypolophid of m3        | Absent, entoconid isolated      | Absent or rudimentary           | Absent or weak                      | Absent, entoconid isolated      | Absent, entoconid isolated      | ?                              | Shallowly notched              | Unnotched                      | Unnotched                      |
| 17. Posthypocristid of m3               | Present, connecting hypoconulid | Present, connecting hypoconulid | Present, connecting hypoconulid     | Present, connecting hypoconulid | Present, connecting hypoconulid | ?                              | Absent                         | Absent                         | Absent                         |
| 18. Hypoconulid lobe of m3              | Narrow                          | Narrow                          | Narrow                              | Narrow or wide                  | Wide                            | ?                              | Wide                           | Wide                           | Wide                           |
| 19. Cuspid lingual to hypoconulid of m3 | Present, lingually placed       | Present, mesially placed        | Absent or mesially placed           | Present, lingually placed       | Present, distally placed        | ?                              | Present, distally placed       | Inconspicuous, distally placed | Inconspicuous, distally placed |

### Supplementary Note 3

#### Character list for the phylogenetic analysis

Our phylogenetic analysis was based on the matrix derived from the data of Hooker and Dashzeveg<sup>13</sup>, which includes various early perissodactyls. We separated the upper and lower dental characters, which were sometimes treated as combined characters based on the occlusal relationships by Hooker and Dashzeveg<sup>13</sup>. *Lophocion* was excluded, because it only preserves upper molars<sup>21</sup>. The new matrix consists of 37 taxa and 70 characters with 15 new taxa and 11 new characters added.

Recently, the early Eocene ceratomorphs *Cambaylophus* and *Vastanolophus* have been reported from India<sup>22,23</sup>. *Cambaylophus* was considered to be a sister group of later *Gandheralophus* from Pakistan and both of them probably originated from *Orientalophus*-like taxa<sup>22</sup>, whereas *Vastanolophus* was considered to be a basal helaletid<sup>23</sup>. Because *Vastanolophus* was only represented by a single m1 and a fragmentary p4, this taxon was excluded from the matrix. Early Eocene *Ghazijhippus*, known from the lower part of the upper Ghazij Formation in Pakistan, represent a basal perissodactyl similar to *Hallensia*<sup>24</sup>. Early Eocene *Gandheralophus* from the upper part of the upper Ghazij Formation is composed of two species: *G. minor* and *G. robustus*<sup>25</sup>; the former is closer to the ancestral morphotype of the genus and was selected for the matrix. *Pachynolophus eulaliensis* and *Pliolophus quesnoyensis* were chosen to represent their respective genera in the matrix of Hooker and Dashzeveg<sup>13</sup>, because of their relatively earlier age and more basal phylogenetic position. Similarly, *Eolophiodon* was chosen to replace *Lophiodon*<sup>26</sup>.

The following specimens and/or references were checked for the character coding.

Outgroup:

*Radinskya yupingae*<sup>27,28</sup>, IVPP V 5255, new added taxon

*Phenacodus*<sup>29</sup>, AMNH FM 15275

*Ectocion*<sup>29</sup>, AMNH FM 16099, 16214



*Cambaytherium*<sup>30</sup>

Ingroup:

*Hallensia matthesi*<sup>31,32</sup>, Halle XIV/3106 (cast AMNH FM 119184)

*Hyracotherium leporinum*<sup>33</sup>, NHMUK PV M16336 (cast AMNH FM 27773)

*Cymbalophus cuniculus*<sup>14,34</sup>, NHMUK PV OR36569 (cast AMNH FM 119190), NHMUK PV M29709 (cast AMNH FM 119185), NHMUK PV M14112 (cast AMNH FM 119187); Ipswich Museum 1971.169 (cast AMNH FM 119186), 1951.28.25 (cast AMNH FM 119191); IRSNB M 167 (cast AMNH FM 13759)

*Sifrhippus sandrae*<sup>10</sup>, UM 83567 (cast AMNH FM 127483), 79889 (cast AMNH FM 127481), 83473 (cast AMNH FM 127482), 83615 (cast AMNH FM 127484),<sup>6</sup>

*Cardiolphus radinskyi*, UM 78915, 68548

*Orientalophus*<sup>35</sup>, IVPP V 5789

*Lambdotherium*<sup>36</sup>, AMNH FM 4863; CM 4963, 62459

*Karagalax mamikhelensis*<sup>37</sup>

*Pachynolophus eulaliensis*<sup>38</sup>

*Pliolophus quesnoyensis*<sup>7</sup>

*Protomoropus gabunia*<sup>13</sup>, PSS. 20-9 (cast AMNH FM 113856)

*Homogalax wutuensis*<sup>9,39</sup>, IVPP V 2809

*Lophiaspis*<sup>40</sup>

*Paleomoropus jepseni*<sup>41</sup>, YPM VPPU 13254

*Litolophus gobiensis*<sup>42,43</sup>, IVPP V 16139, 16141, 16149

*Eolophiodon*<sup>26</sup>

*Eomoropus*<sup>41,44</sup>, AMNH FM 5096; CM 3109

*Heptodon*<sup>45,46</sup>, AMNH FM 4858

*Ghazijhippus*<sup>24</sup>, new added taxon

*Erihippus tingae*<sup>35</sup>, IVPP V 5790, 5789.1, new taxon

*Arenahippus grangeri*<sup>20</sup>, AMNH FM 16134 (cast IVPP FV 446), new added taxon

*Propachynolophus gaudryi*<sup>47</sup>, MSNL 6385 (cast AMNH FM 55904); MNHN

AL-5210 (cast AMNH FM 56600); NMB TS-628 (cast AMNH FM 80195), new added taxon

*Chowliia laoshanensis*<sup>9</sup>, IVPP V 10739, 10740, new added taxon

*Cambaylophus*<sup>22</sup>, new added taxon

*Gandheralophus minor*<sup>25</sup>, GSP-UM 4710, 6770, new added taxon

*Minchenoletes erlianensis*<sup>48</sup>, IVPP V 14683, 14686, 14694, new added taxon

*Danjiangia lambdodon*<sup>18</sup>, IVPP V 5349, new taxon

*Protomoropus? hengyangensis*<sup>16,49</sup>, IVPP V 214, 7453, new taxon

*Pappomoropus taishanensis*<sup>9</sup>, IVPP V 10738, new added taxon

*Danjiangia pingi*<sup>11</sup>, IVPP V 10842, new added taxon

'*Propalaeotherium*' *sinense*<sup>12</sup>, PMUM 3446 (cast IVPP FV 720), 3013 (cast IVPP FV 710), 3444 (cast IVPP FV 719), No. 2 (cast IVPP FV 702), new added taxon

*Eotitanops*<sup>50</sup>, CM 67793, 61941, 22442, new added taxon

*Protorohippus venticolus*<sup>20</sup>, AMNH FM 4832, new added taxon

## Characters

1. Degree of check teeth lophodonty: (0) general lophodonty with small, more or less confluent paraconule and metaconule; (1) weak lophodonty with relatively large paraconule and metaconule; (2) strong lophodonty without paraconule and metaconule; (3) lophodonty with a large paraconule but reduced or lack of metaconule. New character.
2. Upper molar preparaconule crista direction towards: (0) parastyle; (1) preparacrista, sometimes joining it; (2) preparacrista, constantly joining it. (Hooker and Dashzeveg, 2004, Ch. 2)
3. Upper molar paraconule situated related to the protocone: (0) distinctly more mesially; (1) scarcely more mesially; (2) paraconule reduced, situated at nearly the same buccolingual plane as the protocone. (Modified from Hooker and Dashzeveg, 2004, Ch. 3)

4. Occupation of upper molar facet 2A: (0) paraconule and part of preprotocrista; (1) only the paraconule; (2) facet 2A absent, with facet 2 and 3 nearly aligned. (Modified from Hooker and Dashzeveg, 2004, Ch. 3)
5. Molar preprotocrista: (0) unnotched; (1) notched (Modified from Hooker and Dashzeveg, 2004, Ch. 3)
6. 'Metastylid' separated from the metaconid: (0) metaconid rudimentarily twinned; (1) metaconid narrowly twinned; (2) metaconid widely twinned; (3) metaconid not twinned. (Modified from Hooker and Dashzeveg, 2004, Ch. 3)
7. Lower molar cristid obliqua: (0) absent; (1) straight; (2) bowed buccally (modified from Hooker and Dashzeveg, 2004, Ch. 4)
8. Lower molar protolophid: (0) notched; (1) shallowly indented, lophoid. (Hooker and Dashzeveg, 2004, Ch. 5)
9. Lower molar metastylid: (0) a prominent cuspule; (1) weak to lacking (Hooker and Dashzeveg, 2004, Ch. 6)
10. Position of upper molar metaconule: (0) on a line drawn between the metacone and hypocone; (1) (or its position if subsumed by metaloph) distinctly mesial of a line drawn between the metacone and hypocone (Modified from Hooker and Dashzeveg, 2004, Ch. 7)
11. m1-2 hypoconulid: (0) connecting the hypoconid; (1) connecting the middle of the hypoconid and entoconid (hypolophid); (2) small and appressed to the talonid; (3) large and isolated (Modified from Hooker and Dashzeveg, 2004, Ch. 7)
12. Upper molar metaconule: (0) not joined to hypocone by crest; (1) joined to the hypocone by crest (Hooker and Dashzeveg, 2004, Ch. 8)
13. Size of upper molar metaconule: (0) large; (1) size variable, some large, some small; (2) small (3) absent (Modified from Hooker and Dashzeveg, 2004, Ch. 9)
14. Upper molar centrocrista: (0) straight; (1) slightly flexed buccally; (2) sharply flexed buccally (Hooker and Dashzeveg, 2004, Ch. 10)
15. Upper molar mesostyle: (0) lacking; (1) small or variably developed; (2) large

(modified from Hooker and Dashzeveg, 2004, Ch. 11)

16. Lower molar buccal and lingual cusp outer walls converge at about: (0) 45°; (1) 20°; (2) 10°; (3) 5°. (Hooker and Dashzeveg, 2004, Ch. 12)
17. Lower molar metaconid buttress: (0) absent; (1) present, buccal in position; (2) present, lingual in position. (Hooker and Dashzeveg, 2004, Ch. 13)
18. Lower molar cristid obliqua attaches to trigonid: (0) nearer to metaconid than to protoconid; (1) midway between protoconid and metaconid; (2) nearer to protoconid than to metaconid (Hooker and Dashzeveg, 2004, Ch. 14)
19. Attachment of lower molar cristid obliqua on back wall of trigonid: (0) high; (1) low (Hooker and Dashzeveg, 2004, Ch. 15)
20. Lower molar entoconulid: (0) a prominent cuspule; (1) weak to lacking (Hooker and Dashzeveg, 2004, Ch. 16)
21. Lower molar paracristid, when slightly worn, makes angle to tooth long axis of: (0) 50°; (1) 40°; (2) 30°; (3) 20°; (4) 10° (Hooker and Dashzeveg, 2004, Ch. 17)
22. Lower molar paracristid with mesiobuccal angle: (0) rounded; (1) sharp or bulging (Hooker and Dashzeveg, 2004, Ch. 18)
23. Lower molar trigonid back wall: (0) shallow; (1) steep (Hooker and Dashzeveg, 2004, Ch. 19)
24. P1: (0) present; (1) absent (Hooker and Dashzeveg, 2004, Ch. 20)
25. M1-2: (0) as long as broad; (1) broader than long (Hooker and Dashzeveg, 2004, Ch. 21)
26. M3 hypocone: (0) absent; (1) present (Hooker and Dashzeveg, 2004, Ch. 22)
27. M1-2 postmetacrista: (0) short; (1) long (modified from Hooker and Dashzeveg, 2004, Ch. 23)
28. Upper molar parastyle: (0) small; (1) medium; (2) large (Hooker and Dashzeveg, 2004, Ch. 24)
29. Size of M3: (0) smaller than M2; (1) not smaller than M2 (modified from Hooker and Dashzeveg, 2004, Ch. 25)

30. Relative length of m3 hypoconulid: (0) as close to hypoconid as this is to entoconid; (1) more distant but closer to hypoconid than this is to protoconid; (2) as far or further from hypoconid than this is from protoconid. (Hooker and Dashzeveg, 2004, Ch. 26)
31. m3 hypoconulid forming: (0) simple terminal cusp; (1) distal margin of post-talonid lobe; (2) bearing a lobe with a circular basin; (3) bearing a lobe with a cuspule. (modified from Hooker and Dashzeveg, 2010, Ch. 27)
32. m3 hypolophid: (0) incomplete; (1) complete (Hooker and Dashzeveg, 2004, Ch. 28)
33. P3 metacone compared with paracone: (0) smaller; (1) same size (Hooker and Dashzeveg, 2004, Ch. 29)
34. P3: (0) trigon relatively narrow, protoloph weak, paraconule very small and poorly defined; (1) trigon broader, protoloph stronger, paraconule much larger and better defined, but smaller than protocone (modified from Hooker and Dashzeveg, 2004, Ch. 30)
35. p3 metaconid: (0) very small and poorly defined; (1) much larger and better defined, but smaller than protoconid (modified from Hooker and Dashzeveg, 2004, Ch. 30)
36. p3 paraconid: (0) weak and much lower than protoconid; (1) strong and approaching height of protoconid (Hooker and Dashzeveg, 2004, Ch. 31)
37. p1: (0) present; (1) absent (Hooker and Dashzeveg, 2004, Ch. 32)
38. Position of optic foramen related to anterior lacerate foramen: (0) significantly anteriorly; (1) close (Hooker and Dashzeveg, 2004, Ch. 33)
39. Navicular facet of astragalus: (0) convex; (1) saddle-shaped (Hooker and Dashzeveg, 2004, Ch. 34)
40. Astragalar canal: (0) present; (1) absent (Hooker and Dashzeveg, 2004, Ch. 35)
41. Upper molars: (0) with no metaloph; (1) with prehypocrista but without metacone fold; (2) metacone fold some joined to metaconule, some not; (3)

consistently joined to metaconule forming complete metaloph; (4) buccal end of metaloph (homologue of metacone fold) shifted mesially from metacone (modified from Hooker, 2010<sup>51</sup>, Ch. 32)

42. Lower preultimate molar: (0) without hypolophid; (1) hypolophid complete, comprising equal buccal and lingual segments of former postcristid joining in middle at notch in front of hypoconulid; (2) buccal segment lengthened at expense of lingual segment with lingual hypoconulid; (3) equal buccal and lingual segments joined into strong unnotched loph, hypoconulid median; (4) hypolophid notched but complete like state 1, some with lingual segment broken; (5) hypolophid with lingual segment consistently broken (Hooker and Dashzeveg, 2004, Ch. 37)
43. Lower m1-2 distal cingulum lingual of hypoconulid: (0) absent; (1) present (Hooker and Dashzeveg, 2004, Ch. 38)
44. Lower molar hypolophid (or line drawn between hypoconid and entoconid), especially on m3: (0) transverse; (1) oblique (modified from Hooker and Dashzeveg, 2004, Ch. 39)
45. Distal lower molar metaconid compared to mesial metaconid: (0) larger than or equal to; (1) distal smaller than mesial (Hooker and Dashzeveg, 2004, Ch. 40)
46. Mesial crest of lower molar metaconid: (0) present; (1) absent (Hooker and Dashzeveg, 2004, Ch. 41)
47. Upper molar parastyle: (0) pointing essentially occlusally; (1) recurved strongly distally (Hooker and Dashzeveg, 2004, Ch. 42)
48. Position of M3 parastyle: (0) aligned with those of M1-2; (1) projecting strongly buccally in some individuals; (2) consistently projecting strongly buccally (Hooker and Dashzeveg, 2004, Ch. 43)
49. Upper molar metacone: (0) vertically implanted; (1) tilted lingually slightly; (2) tilted lingually markedly (Hooker and Dashzeveg, 2004, Ch. 44)
50. Upper molar paracone: (0) vertically implanted; (1) tilted buccally slightly; (2)

tilted buccally markedly; (3) tilted lingually (modified from Hooker and Dashzeveg, 2004, Ch. 45)

51. P4 postprotocrista: (0) present; (1) absent (Hooker and Dashzeveg, 2004, Ch. 46)
52. P4 metaconule: (0) present, large; (1) weak; (2) absent (Hooker and Dashzeveg, 2004, Ch. 47)
53. P4 premetaconule crista: (0) weak; (1) strong, high on ectoloph (Hooker and Dashzeveg, 2004, Ch. 48)
54. P4 metaconule and postprotocrista or its position: (0) distal of a line between metacone and protocone; (1) more mesial (Hooker and Dashzeveg, 2004, Ch. 49)
55. P3 postprotocrista: (0) absent; (1) faint; (2) strong (Hooker and Dashzeveg, 2004, Ch. 50)
56. P3 paracone and metacone: (0) well separated as on P4; (1) closer together; (2) very close (Hooker and Dashzeveg, 2004, Ch. 51)
57. Post P1 diastema: (0) as long as upper postcanine diastema; (1) shorter; (2) absent (Hooker and Dashzeveg, 2004, Ch. 52)
58. Post p1 diastema: (0) as long as lower postcanine diastema; (1) shorter; (2) longer; (3) absent (modified from Hooker and Dashzeveg, 2004, Ch. 53)
59. p2-3 diastema: (0) present; (1) absent (Hooker and Dashzeveg, 2004, Ch. 54)

#### **New characters**

60. Lingual side of upper molar paracone: (0) convex; (1) flat or slightly convex; (2) with a crista.
61. Buccal side of upper molar paracone: (0) rounded (or concial); (2) mesiodistally pinched; (2) generally flat with a crista.
62. Buccal surface of upper molar metacone: (0) distinctly convex; (1) slightly convex; (2) nearly flat.
63. Upper molar paraconule position: (0) midway between paracone and protocone; (1) closer to protocone; (2) closer to paracone.
64. Position of hypocone related to protocone on molars: (0) equally lingually placed



- or more lingually; (1) slightly more buccally.
65. Upper molar lingual cingulum: (0) absent; (1) generally complete; (2) restricted in the central valley
66. A cuspule lingual to hypoconulid on m3: (0) absent; (1) present, distolingually placed and smaller; (2) present, mesiolingually placed; (3) present, distolingually placed and larger
67. Buccal branch of m3 hypoconulid lobe direction towards: (0) buccal branch absent; (1) hypoconid; (2) the point closer to hypoconid than to entoconid; (3) the midpoint of hypolophid; (4) entoconid.
68. Mastoid exposure orientation: (0) occipital; (1) lateral; (2) absent. (Modified from Holbrook, 2014<sup>27</sup>, ch. 7)
69. Nasal shape: (0) posteriorly narrow; (1) posteriorly broad (Holbrook <sup>52</sup>, 1999, C2)
70. Nasolacrimal contact: (0) present; (1) absent (Holbrook <sup>52</sup>, 1999, C3)

## MATRIX

|                                                                        | 1 | 2 | 3 | 4 | 5 | 6 | 7 |
|------------------------------------------------------------------------|---|---|---|---|---|---|---|
| 1234567890123456789012345678901234567890123456789012345678901234567890 |   |   |   |   |   |   |   |

-----

```

Radinskya
00000???"0?1000?????????011001?????????1?????00000000?????000000??110

Phenacodus
10001-1000002200000000000000000000000000-00000000000000000101000

Cambaytherium
110010001130000?1--1--000100120000000?100001-1--0011?00212100000030?1?

Hallensia matthesi
110011101101000?11113100110001001100011120100?000010001112000000220?10

Hyracotherium leporinum
1201111011010111110111001111121011???"11?25000?00000001201?100001123?11

Cymbalophus
02110111111120031211311?1111101011100???"2100010001?10100?1100100121???
```

*Sifrhippus sanderi*

02110110110120031111211?0111111011000111240000000110110?1?1101121???

1

*Cardiolphus*

021?012111211002121141101102103110100?1143110101100111110210001020221?

1

*Orientalophus*

021?0???1?1200?????????1?01?????????????1???????10?????????000102?????

*Lambdotherium*

3100111111212223200101001102122110001?1112010100230101201-10222020411?

*Ectocion*

11001-1000000221010000101001000000000010000-000000000000000120101???

*Karagalax*

02120311112120020211411?0111113110010?112310-00000010110??110110203???

3

*Pachynolophus eulaliensis*

021?01111121211?1011110011001231110001??1200010010010100111001011?3?1?

1

1 3

*Pliolophus quesnoyensis*

021?01101101200?1111211?0101121010100?111100010000010100?1100000121???

1

*Protomoropus*

32111210112110031111111?111210211??????33111102000211?????02101103???

*Homogalax wutuensis*

0211022011?120031211411?1?02?03110??????3311110?10011111??00110202???

*Lophiaspis*

32111211112130032111211?110210?11??????4311111212021112??1002112?????

*Paleomoropus*

32111?????1?1300?????????11021??????????43?????1211?????????002001?????

*Litolophus*

3211121111213002200111100112103111101?1143101112000201211-112201103?1?

*Eolophiodon*

321?03111121300?211131110112103110101??4301-10002021102--12021120?110

*Eomoropus*

32111211112132232001111?011210311010101143101112000211212-112201203210

*Heptodon*

2222032111213003021121111111031101100113310-00011011120231002-1103110

*Ghazijhippus*

121111011?1000?11111101102101011??0??4??10?000001012011100001213?1?

*Erihippus tingae*

02110010110120021211311?1?011010?????????3400-10?00?????????11001011???

1

*Arenahippus*

121101???101200??????1100101101011100?11240001000011011011100000121???

*Propachynolophus gaudryi*

12101211112101132001310?1102123111100???120101001001012013100100103???

*Chowliia*

0211022011211002121141101102103110000???4311010010011110?2100110103???

2

*Cambaylophus*

021?0???1?1200????????01011?????????3?????0000?????????001102?????

*Gandheralophus*

02220311112130010211411?11021031101?0???3300-10010021111?3100000102???

*Minchenletes*

22220321112130030211211?1?121?????????4301-100101101?????202-0??????

*Danjiangia lambdodon*

?????1?1?2?????00?2????????????00??????1????????????1???????????

*Protomoropus? hengyangensis*

?????2111?????12111301?????221????????????111?????????????????03???

2 3 1

*Pappamoropus*

?????2101?2?????21111101?????231??101????31100?????????21?????03???

*Danjiangia pingi*

3100121111212221200101101102122110000???120101102301010112102221204?1?

*Propalaeotherium sinense*

31001211112122232001111?11021221????????1211010?23?????????02220203???

*Eotitanops*

300?111111212223200111101002023100000?111201-1002301012012102220004???

*Protorohippus venticolus*

1201101111010112100121001101111111001111500?100101001201110000010111?

### Supplementary References

- 1 Vandenberghe, N., Hilgen, F. J. & Speijer, R. P. in *A Geologic Time Scale 2012* (eds F. M. Gradstein, J. G. Ogg, M. D. Schmitz, & G. M. Ogg) 855–921, (Elsevier, 2012).
- 2 Ting, S. Y. in *Dawn of the age of Mammals in Asia* (eds C. Beard & M R Dawson) 124–147 (Bull Carnegie Mus Nat Hist **34**, 1998).
- 3 Ting, S. *et al.* Asian early Paleogene chronology and mammalian faunal turnover events. *Vert PalAsiat* **49**, 1–28 (2011).
- 4 Hooker, J. J. in *Correlation of the Early Paleogene in Northwest Europe* (eds R. W. O'B. Knox, R. M. Corfield, & R. E. Dunay) 205–218 (Geol Soc Spec

- Publ **101**, 1996).
- 5 Hooker, J. J. A two-phase Mammalian Dispersal Event across the Paleocene-Eocene transition. *Newsl Stratigr* **48**, 201–220 (2015).
  - 6 Gingerich, P. D. New earliest Wasatchian mammalian fauna from the Eocene of northwestern Wyoming: composition and diversity in a rarely sampled high-floodplain assemblage. *Univ Mich Pap on Paleontol* **28**, 1–97 (1989).
  - 7 Bronnert, C., Gheerbrant, E., Godinot, M. & Métais, G. A primitive perissodactyl (Mammalia) from the early Eocene of Le Quesnoy (MP7, France). *Hist Biol* **30**, 237–250, doi:10.1080/08912963.2017.1341502 (2017).
  - 8 Kitts, D. B. American *Hyracotherium* (Perissodactyla, Equidae). *Bull Am Mus Nat Hist* **110**, 1–60 (1956).
  - 9 Tong, Y. S. & Wang, J. W. Fossil mammals from the Early Eocene Wutu Formation of Shandong Province. *Palaeont Sin, New Ser C* **28**, 1–195 (2006).
  - 10 Gingerich, P. D. Systematics and Evolution of Early Eocene Perissodactyla (Mammalia) in the Clarks Fork Basin, Wyoming. *Contrib Mus Paleont, Univ Mich* **28**, 181–213 (1991).
  - 11 Wang, Y. A new primitive chalicothere (Perissodactyla, Mammalia) from the early Eocene of Hubei, China. *Vert PalAsiat* **33**, 138–159 (1995).
  - 12 Zdansky, O. Die alttertiären Säugetiere Chinas nebst stratigraphischen Bemerkungen. *Palaeontol Sin, Ser C* **6**, 5–87 (1930).
  - 13 Hooker, J. J. & Dashzeveg, D. The origin of chalicotheres (Perissodactyla, Mammalia). *Palaeontology* **47**, 1363–1386 (2004).
  - 14 Hooker, J. J. A primitive Ceratomorph (Perissodactyla, Mammalia) from the Early Tertiary of Europe. *Zool J Linn Soc* **82**, 229–244, doi:Doi 10.1111/J.1096-3642.1984.Tb00545.X (1984).
  - 15 Liu, X. & Fu, D. Y. Sedimentary facies and the tectonic development of the Hengyang Basin, Hunan Province. *Acta Geosci Sin* **8**, 13–36 (1986).
  - 16 Ting, S. *et al.* in *Causes and consequences of globally warm climates in the*

- early Paleogene* (eds Scott L. Wing, Philip D. Gingerich, Birger Schmitz, & Ellen Thomas) 521–535 (Geol Soc Am Spec Pap **369**, 2003).
- 17 Tong, Y. S., Wang, Y. Q. & Li, Q. Subdivision of the Paleogene in Lingcha Area of Hunan Province and Early Eocene Mammalian Faunas of China. *Geol Rev* **52**, 153–162 (2006).
- 18 Li, C. K., Qiu, Z. X., Yan, D. F. & Xie, S. H. Notes on some early Eocene mammalian fossils of Hengtung, Hunan. *Vert Palasiat* **17**, 71–80 (1979).
- 19 Bowen, G. J. *et al.* Mammalian dispersal at the Paleocene/Eocene boundary. *Science* **295**, 2062–2065 (2002).
- 20 Froehlich, D. J. Quo vadis *Eohippus*? The systematics and taxonomy of the early Eocene equids (Perissodactyla). *Zool J Linn Soc* **134**, 141–256, doi:Doi 10.1046/J.1096-3642.2002.00005.X (2002).
- 21 Wang, J. W. & Tong, Y. S. A new phenacodontid condylarth (Mammalia) from the early Eocene of the Wutu Basin, Shandong. *Vert Palasiat* **35**, 283–289 (1997).
- 22 Kapur, V. V. & Bajpai, S. Oldest South Asian tapiromorph (Perissodactyla, Mammalia) from the Cambay Shale Formation, western India, with comments on its phylogenetic position and biogeographic implications. *The Palaeobotanist* **64**, 95–103 (2015).
- 23 Smith, T. *et al.* First early Eocene tapiroid from India and its implication for the paleobiogeographic origin of perissodactyls. *Palaeovertebrata* **39**, 1–9, doi:10.18563/pv.39.2.e5 (2015).
- 24 Missiaen, P. & Gingerich, P. D. New Basal Perissodactyla (Mammalia) From The Lower Eocene Ghazij Formation of Pakistan. *Contrib Mus Paleont, Univ Mich* **32**, 139–160 (2014).
- 25 Missiaen, P. & Gingerich, P. D. New early Eocene tapiromorph perissodactyls from the Ghazij Formation of Pakistan, with implications for mammalian biochronology in Asia. *Acta Palaeontol Pol* **57**, 21–34, doi:Doi

- 10.4202/App.2010.0093 (2012).
- 26 Robinet, C., Remy, J. A., Laurent, Y., Danilo, L. & Lihoreau, F. A new genus of Lophiodontidae (Perissodactyla, Mammalia) from the early Eocene of La Borie (Southern France) and the origin of the genus *Lophiodon* Cuvier, 1822. *Geobios* **48**, 25–38, doi:10.1016/j.geobios.2014.11.003 (2015).
- 27 Holbrook, L. T. On the skull of *Radinskya* (Mammalia) and its phylogenetic position. *J Vert Paleont* **34**, 1203–1215, doi:10.1080/02724634.2014.854249 (2014).
- 28 McKenna, M. C., Chow, M., Ting, S. & Luo, Z. in *The evolution of perissodactyls* (eds D. R. Prothero & R. M. Schoch) 24–36 (Oxford University Press, 1989).
- 29 Thewissen, J. G. M. Evolution of Paleocene and Eocene Phenacodontidae (Mammalia, Condylarthra). *Univ Mich Pap on Paleontol* **29**, 1–107 (1990).
- 30 Rose, K. D. *et al.* Early Eocene fossils suggest that the mammalian order Perissodactyla originated in India. *Nat Commun* **5**, 1–9, doi:10.1038/ncomms6570 (2014).
- 31 Franzen, J. L. & Haubold, H. Ein neuer condylarthre und ein tillodontier (Mammalia) aus dem Mitteleozän des Geiseltales. *Palaeovertebrata* **16**, 35–53 (1986).
- 32 Franzen, J. E. *Hallensia* (Mammalia, Perissodactyla) aus Messel und dem Parisen Becker sowie Nachtrige aus dem Geiseltal. *Bull Inst Sci Nat Belg (Sci Terre)* **60**, 175–201 (1990).
- 33 Hooker, J. J. The beginning of the equoid radiation. *Zool J Linn Soc* **112**, 29–63 (1994).
- 34 Missiaen, P., Quesnel, F., Dupuis, C., Storme, J.-Y. & Smith, T. The earliest Eocene mammal fauna of the Erquelinnes Sand Member near the French-Belgian border. *Geol Belg* **16**, 262–273 (2013).
- 35 Ting, S. Y. A preliminary report on an Early Eocene mammalian fauna from

- Hengdong, Hunan Province, China. *Kaupia* **3**, 201–207 (1993).
- 36 Bonillas, Y. The Dentition of *Lambdaotherium*. *J Mammal* **17**, 139–142 (1936).
- 37 Maas, M. C., Hussain, S. T., Leinders, J. J. M. & Thewissen, J. G. M. A new isectolophid tapiromorph (Perissodactyla, Mammalia) from the Early Eocene of Pakistan. *J Paleont* **75**, 407–417, doi:10.1666/0022-3360(2001)075<0407:anitpm>2.0.co;2 (2001).
- 38 Danilo, L. *et al.* A New Eocene Locality in Southern France Sheds Light on the Basal Radiation of Palaeotheriidae (Mammalia, Perissodactyla, Equoidea). *J Vert Paleont* **33**, 195–215 (2013).
- 39 Chow, M. C. & Li, C. K. *Homogalax* and *Heptodon* of Shantung. *Vert PalAsiat* **9**, 15–21 (1965).
- 40 Savage, D., Russell, D. & Louis, P. Ceratomorpha and Ancylopoda (Perissodactyla) from the Lower Eocene Paris Basin, France. *Univ Calif Pub Geol Sci* **66**, 1–38 (1966).
- 41 Radinsky, L. B. *Paleomoropus*, a new early Eocene chalicothere (Mammalia, Perissodactyla), and a revision of Eocene chalicotheres. *Am Mus Novit* **2179**, 1–28 (1964).
- 42 Bai, B., Wang, Y. Q. & Meng, J. New craniodental materials of *Litolophus gobiensis* (Perissodactyla, "Eomoropidae") from Inner Mongolia, China, and phylogenetic analyses of Eocene chalicotheres. *Am Mus Novit* **3688**, 1–27 (2010).
- 43 Colbert, E. H. Chalicotheres from Mongolia and China in the American Museum. *Bull Am Mus Nat Hist* **67**, 353–387 (1934).
- 44 Osborn, H. F. *Eomoropus*, an American Eocene chalicothere. *Bull Am Mus Nat Hist* **32**, 261–274 (1913).
- 45 Radinsky, L. B. Evolution of the Tapiroid skeleton from *Heptodon* to *Tapirus*. *Bull Mus Comp Zool* **134**, 69–106 (1965).
- 46 Radinsky, L. Origin and early evolution of North American Tapiroidea. *Bull*



- Peabody Mus Nat Hist* **17**, 1–106 (1963).
- 47 Savage, D. E., Russell, D. E. & Louis, P. European Eocene Equidae (Perissodactyla). *Univ Calif Pub Geol Sci* **56**, 1–94 (1965).
- 48 Wang, Y. *et al.* Early Eocene perissodactyls (Mammalia) from the upper Nomogen Formation of The Erlian Basin, Nei Mongol, China. *Vert Palasiat* **49**, 123–140 (2011).
- 49 Young, C.-C. Note on the first Eocene mammal from South China. *Am Mus Novit* **1268**, 1–3 (1944).
- 50 Osborn, H. F. Titanotheres of ancient Wyoming, Dakota, and Nebraska. *Monogr U S Geol Surv* **55**, 1–894 (1929).
- 51 Hooker, J. J. The mammal fauna of the early Eocene Blackheath Formation of Abbey Wood, London. *Monogr Palaeontogr Soc* **164**, 1–157 (2010).
- 52 Holbrook, L. T. The phylogeny and classification of Tapiromorph Perissodactyls (Mammalia). *Cladistics* **15**, 331–350 (1999).
